## **Title of paper**

Fractone bulbs derive from ependymal cells and their laminin composition affects cell proliferation in the subventricular zone

## **Authors, institutional affiliations and complete mailing address**

Marcos Assis Nascimento

Institute of Physiological Chemistry and Pathobiochemistry and Cells-in-Motion (CiM) Cluster of Excellence, University of Münster, 48149 Münster, Germany;

Institute of Biophysics, Federal University of Rio de Janeiro, 21941-902 Rio de Janeiro, Brazil.

Tatiana Coelho-Sampaio

Institute of Biomedical Sciences, Federal University of Rio de Janeiro, 21941-902 Rio de Janeiro, Brazil.

Lydia Sorokin

Institute of Physiological Chemistry and Pathobiochemistry and Cells-in-Motion (CiM) Cluster of Excellence, University of Münster, 48149 Münster, Germany.

## **Number of Figures:**

7 Main Figures + 3 Supporting Figures

## **Corresponding author**

Marcos Assis Nascimento (manascimento@biof.ufrj.br)

Address: Av. Carlos Chagas Filho 373, Centro de Ciências da Saúde, B-11, Rio de Janeiro, Brazil. Postal code: 21941-902

## **Key Words**

Neural Stem Cells, Extracellular Matrix, Cell Division, Stem Cell Niche

# Abstract

Fractones are extracellular matrix structures in the neural stem cell niche of the subventricular zone (**SVZ**). Their cellular origin and what determines their localization at this site is poorly studied and it remains unclear whether they influence neural stem and progenitor cells (**NSPCs**) formation, proliferation and/or maintenance. To address these questions, we analyzed whole mount preparations of the lateral ventricle by confocal microscopy using different extracellular matrix and cell markers, revealing laminin  $\alpha 5$  as a major component of fractones, which were profusely distributed throughout the SVZ and appeared at the center of pinwheels, a critical site for adult neurogenesis. We demonstrate that fractones appear at the apical membrane of ependymal cells at the end of the first week after birth, and the use of transgenic mice lacking laminin  $\alpha 5$  gene expression (*Lama5*) in endothelium and in FoxJ1-expressing ependymal cells, revealed ependymal cells as the source of laminin  $\alpha 5$ -containing fractones. Loss of laminin  $\alpha 5$  from fractone bulbs correlated with an aberrant upregulation of laminin  $\alpha 2$  and a two-fold increase in the proliferation of NSPCs, as determined by PH3 staining. These results indicate that fractones are a key component of the SVZ and that the laminin isoform composition at this site affects NSPC numbers.

# Introduction

The subventricular zone (**SVZ**) is the largest and most studied neural stem cell niche in adult mice. Within this niche, neural stem and progenitor cells (**NSPCs**) contact the ependymal cell layer lining the ventricles (Doetsch et al., 1999) and the basement membranes (**BMs**) of blood vessels (Shen et al., 2008; Tavazoie et al., 2008). BMs are specialized extracellular matrix sheets, which in most tissues underlie endothelia and epithelial layers and ensheath nerves and muscle fibers, but in the SVZ appear in an unique punctate pattern. In the CNS, blood vessels are surrounded by two biochemically distinct BMs, one underlying the endothelium and one produced by astrocytes and deposited in the parenchymal BM (Sixt et al., 2001; Wu et al., 2009). Fractones are described to

emerge from capillaries as thin stems, which branch profusely and terminate as BMs bulbs at the ependymal layer (Leonhardt and Desaga, 1975; Mercier et al., 2002, 2011), thereby accounting for their punctate appearance. Laminins are the main functional constituents of BMs, acting as a molecular scaffold for its assembly and providing biological signals that control cell migration, differentiation and proliferation (Smyth et al., 1999). All members of the laminin family are heterotrimers composed of one  $\alpha$ , one  $\beta$  and one  $\gamma$  chain that combine to form 16 distinct isoforms with tissue specific distributions and functions (Durbeej, 2010). The C-terminus of the 5 laminin  $\alpha$  chains are key to laminin signaling, bearing in most isoforms the domains recognized by membrane receptors that regulate cellular adhesion, migration and division (Colognato and Yurchenco, 2000). Although it has been shown that fractone bulbs contain several laminin  $\alpha$  chains, it is not yet clear if they are present in similar amounts (Kazanis et al., 2010). Laminins containing the  $\alpha 5$  chain have been shown to be crucial for pluripotent stem cell survival and self-renewal *in vitro* (Hongisto et al., 2012; Miyazaki et al., 2012; Laperle et al., 2015) and for inhibiting the proliferation of keratinocytes *in vivo* (Wegner et al., 2016). The effects of fractones on NSPCs physiology has been attributed to the perlecan; however, this is based solely on its ability to bind growth factors, e.g. bFGF, BMP-4 and BMP-7, and to present them to contacting cells (Douet et al., 2012; Kerever et al., 2014; Mercier and Douet, 2014).

Despite growing evidence of the relevance of fractones in the SVZ (Kazanis et al., 2010; Mercier et al., 2012), a comprehensive understanding of their location is still lacking, in particular how fractones relate to NSPCs and pinwheels, critical structures for adult neurogenesis formed by NSPCs and ependymal cells at the ventricle wall (Mirzadeh et al., 2008). In addition, identifying the cells responsible for producing fractones and determining whether the laminin composition plays a role in SVZ physiology are crucial to understanding how stem cells are formed and maintained at this site.

Previous studies have identified interactions between GFAP<sup>+</sup> neural stem cells and pan-laminin<sup>+</sup> fractones using electron microscopy and immunofluorescence stainings of coronal sections of the SVZ (Leonhardt and Desaga, 1975; Mercier et al., 2002, 2011). Although suitable for unveiling

the existence of such interactions, analyzes of thin tissue sections cannot fully address interactions between fractones and neural stem cells at the SVZ, due the filamentous nature of GFAP+ cells. We therefore here analyze the position of fractone bulbs using 3D reconstruction of immunofluorescently stained whole mounts of the lateral wall, revealing that fractones are most frequently located precisely at the center of pinwheels. To identify the cell responsible for producing fractone bulbs and to investigate whether its laminin composition is important for regulating NSPC proliferation in the SVZ, we analyzed mice lacking *Lama5* expression in endothelial cells, pericytes/smooth muscle or ciliated ependymal cells. Our data suggest that ependymal cells are the source of laminin  $\alpha 5$ -containing fractones, and demonstrated that the loss of laminin  $\alpha 5$  at this site correlated with an aberrant upregulation of laminin  $\alpha 2$  and a two-fold increase in the proliferation of NSPCs, as determined by PH3 staining. Our findings indicate that fractone bulbs are ependymally-derived basement membrane structures critical to SVZ physiology.

## Materials & Methods

*Experimental Animals.* FoxJ1/*Lama5*<sup>-/-</sup> mice were obtained by crossing FoxJ1-Cre mice (Zhang et al., 2007) with *Lama5*<sup>flox/flox</sup> mice (Song et al., 2013); Tie2/*Lama5*<sup>-/-</sup> mice were obtained in analogous way (Song et al., 2013). *Lama4*<sup>-/-</sup> mice were previously described (Thyboll et al., 2002). All mice were on a C57BL/6 background (Charles River Laboratories). Male and female mice were used. Animal breeding and procedures were conducted according to the German Animal Welfare guidelines.

*Histological Preparations.* Brains were dissected and fixed overnight at 4°C in 2% paraformaldehyde in PBS. Thick (50  $\mu$ m) coronal sections were made using a Zeiss Vibratome. Whole mounts were prepared from dissecting lateral walls of the lateral ventricles as described previously (Mirzadeh et al., 2008, 2010).

*Antibodies & Immunohistochemistry.* Sections and whole mounts were washed in PBS, blocked with 5% goat serum/PBS or 1% BSA/PBS (Sigma) and incubated with primary antibodies overnight at 4°C.



Primary antibodies used: Anti-laminin  $\alpha$ 2 (4H8-2) (Schuler and Sorokin, 1995) anti-laminin  $\alpha$ 5 (4G6) (Sorokin et al., 1997b), anti-laminin  $\gamma$ 1 (3E10) (Sixt et al., 2001), anti-pan-laminin (455) (Sorokin, 1990), anti- $\beta$ -catenin (Sigma cat.# C2206, 1:1000), anti-GFAP (Sigma cat.# C9205, 1:800; eBioscience cat.# 53-9892, 1:500), anti-nestin (rat-401, DSHB/Iowa 1:100), anti-PH3 (Millipore cat.# 06-570, 1:500). After the incubation, tissues were thoroughly washed with PBS and incubated with secondary antibodies: Alexa 488 anti-rat (Life Technologies cat.# A11006, 1:1000), Alexa 555 anti-rat (Abcam cat.# ab150154, 1:1000), Alexa 568 anti-rabbit (Life Technologies cat.# A11011 1:1000), Alexa 647 anti-rabbit (Jackson/Dianova cat.# 111-605-144 1:1000). After incubation with secondary antibodies, thick sections and whole mounts were mounted with mounting media and a coverslip. Tissues were analyzed using a Zeiss Axiolmager microscope equipped with epifluorescent optics and documented with a Hamamatsu ORCA ER camera or with a Zeiss confocal laser scanning microscope LSM 700.

*In situ hybridization.* In situ hybridization for laminin  $\alpha$ 5 mRNA was performed as previously described (Sorokin et al., 1997a).

*Morphological and Statistical Analyses.* For PH3+ nuclei quantification, whole mounts were photographed with a 10x objective lens in the Zeiss Axiolmager. Pictures were merged using Adobe Photoshop CS3 (Adobe Systems, Mountain View, CA). Merged pictures were processed using ImageJ (U.S. National Institutes of Health, Bethesda, MD, USA) and nuclei were quantified. Mice were age-matched (60 days old). For quantification of fractone bulbs volume, pan-laminin stainings in coronal sections were rendered in tridimensional volumes and quantified using Imaris 7.0 software (Bitplane). When comparing genotypes, mice were age-matched (~200 days old). For analyses of interactions of GFAP+ processes and bulbs in old mice, GFAP and pan-laminin stainings of whole mounts were reconstructed in 3D using Imaris. Statistical analyses were made using Graphpad Prism 6 (GraphPad Software Inc., La Jolla, CA). ANOVA with Bonferroni post test with a 95% confidence interval was used to analyze differences in number of nuclei positive for the PH3 proliferation marker.

## Results

### An en face view of interactions between GFAP+ cells and fractones.

In order to have a more comprehensive view of the interactions between neural stem cells (NSCs) and fractones, whole mounts of the SVZ were simultaneously immunofluorescently stained for laminin  $\gamma 1$  to mark BMs, GFAP to mark NSCs and  $\beta$ -catenin to reveal ependymal cells junctions. First, we observed that fractone bulbs comprise a significant part of all BM in the neurogenic niche (Fig. 1A), located between neighboring  $\beta$ -catenin+ ependymal cells (Fig. 1B). GFAP+ neural stem cells interact with BMs of blood vessels (Fig. 1C, *yellow arrowhead*) but their cell bodies and processes also contact several fractone bulbs at the same time (Fig. 1C, *arrowheads*).

NSCs exhibiting processes that contact the cerebrospinal fluid are the basic neurogenic unit in the SVZ and, together with surrounding ependymal cells, they form a distinct pinwheel-like arrangement (Mirzadeh et al., 2008). We observed that fractone bulbs are frequently at the center of pinwheels, where they contact neural stem cell bodies or processes (Fig. 1 C-E, Supp. 1). Fractone bulbs are located at the basolateral surface of ependymal cells, some are closer to the ventricular surface and can be found at the center of pinwheels (Fig. 1F, *surface, arrowheads*). These fractones seem to be preferentially contacted by GFAP+ processes (Fig. 1F, *6.2  $\mu$ m deep, arrowheads*). The labeled interactions (Fig. 1F, 1-3) between GFAP+ processes and fractone bulbs at pinwheels centers were reconstructed in 3D, indicating a direct contact between them.

### Fractone bulbs are enriched in laminin $\alpha 5$ .

Fractones are regarded as BM structures that emerge from capillaries as thin threads, known as stems, that branch out and reach the ependymal layer, where they become visible as spherical deposits known as bulbs (Mercier et al., 2002, 2011). We used monoclonal antibodies specific for each laminin  $\alpha$  chain to investigate the isoforms present in fractone bulbs. We found that fractone bulbs exhibited strong laminin  $\alpha 5$  staining, and only a few showed a weak immunoreactivity for the  $\alpha 2$  chain (Fig.2, *arrowheads*). Laminin  $\alpha 4$  was not found in any fractone bulb, in contrast to

previous reports (Kazanis et al., 2010). Laminin  $\alpha 1$  and  $\alpha 3$  chains were also completely absent in bulbs (not shown), which is consistent with the literature (Kazanis et al., 2010).

# **Fractone bulbs are produced by ependymal cells during the first week after birth.**

To determine when fractone bulbs form and whether this correlates with appearance of laminin  $\alpha 5$  expression, we investigated the emergence of fractones at the ependymal walls during development. To do so, we checked the laminin isoform expression at the SVZ every day during the first week after birth. Fractone bulbs, as defined by a punctate laminin  $\gamma 1$  staining, were not detected at P0, however, in addition to blood vessel staining, a faint and disperse laminin  $\gamma 1$  chain staining lining the ventricle was detectable at the nestin<sup>+</sup> layer of late radial glial cells/early NSCs (Fig. 3A). Laminin  $\alpha 5$  expression in blood vessels in the CNS starts approximately at the third week after birth (Sorokin et al., 1997b). However, in situ hybridization showed that mRNA for the laminin  $\alpha 5$  chain is already expressed at the ventricle surface (Fig. 3B, arrow) and choroid plexus at P0 (Fig. 3B, arrowhead) as reported previously (Sorokin et al., 1997b). At P3, more condensed spots positive for laminin  $\gamma 1$  and  $\alpha 5$  were present in some regions of the ventricle (Fig. 3C). Laminin expression was spatially heterogeneous, with dense laminin expression at regions of the dorsal wall while most portions of the lateral wall lacked laminin immunoreactivity (Supp. 2). At P7, early laminin  $\alpha 5$  and  $\gamma 1$  chain positive fractones were visible along all the ependymal surface of the lateral ventricles (Fig. 3D). In a frontal view of a P7 ependyma using a whole mount preparation, we observed that these first fractones are small patches of BM at the apical surface of the ependymal cells, (Fig. 3E, F). Analysis of FoxJ1-RFP reporter animals that express RFP under the control of the ependymal-specific promoter FoxJ1, revealed laminin  $\gamma 1$  inside ependymal cells and some early fractones already at the cell surface (Fig. 3G).

Fractones bulbs first appeared as small BM patches at the surface of ependymal cells, indicating that these structures undergo major spatial and morphological changes until adulthood.

We therefore investigated whether fractone size changed over time by measuring their volumes in 3D stacks from confocal microscopy at P34, P86, P162, P175, P269 and P303. We observed that the mean volume increases gradually, showing a linear correlation with age ( $R^2=0.91$ ). This result extends the recent observation that bulbs are larger in 100 week old mice than in 12 week-old mice (Kerever et al., 2015). A frequency distribution analysis showed that this increase in size occurs in the entire fractone population (Fig. 4A, B). Mice older than 200 days displayed large fractones ( $> 40 \mu\text{m}^3$ ) and were associated with more GFAP+ processes contacts than fractones in younger animals. In old mice ( $>200$  days), the vast majority of fractone bulbs at pinwheel centers have a tunnel-like structure, allowing NSCs to extend their processes within these tunnels of basement membrane and reach the CSF (Fig. 4C). In addition, old mice had unique enlarged fractone bulbs, with some reaching over  $20 \mu\text{m}$  in diameter (Fig. 4D, *arrowheads*). These giant fractones were associated with clusters of cells at the anterior ventral part of the ventricular wall (Fig. 4D, *arrows*). Such cell clusters were associated with both GFAP+ and GFAP- cells, and were surrounded by a strong  $\beta$ -catenin expression (Fig. 4E, *middle panels, red*). We also observed fragmented laminin deposits in their interior (Fig. 4E, *arrowheads*). Serial imaging through the giant pinwheels and 3D reconstruction revealed that the giant bulbs associated with these clusters were filled with GFAP+ processes that transverse them and reach more distant and smaller fractones (Fig. 4F, *top and bottom panels*). These data indicate that fractones are not static structures, since their size, shape, position and cellular interactions change gradually with age, becoming larger and more complex in old mice.

The early appearance of laminin  $\alpha 5$  in fractones, before its expression is known to occur in association with CNS blood vessels (Sorokin et al., 1997b) suggests an ependymal source of laminin  $\alpha 5$ + fractones. To more precisely investigate this possibility, we investigated laminin  $\alpha 5$ + fractone bulbs in transgenic mice lacking the expression of *Lama5* in endothelium (*Tie2/Lama5<sup>-/-</sup>*) and in ciliated epithelial cells include ependymal cells (*Foxj1/Lama5<sup>-/-</sup>*). *Tie2/Lama5<sup>-/-</sup>* mice showed no changes in laminin  $\alpha 5$  staining of fractone bulbs (Fig. 5A). We quantified the volumes of fractone

bulbs in 3D reconstructions of confocal stacks and we did not find any significant differences among these genotypes ( $31.11\mu\text{m}^3 \pm 7.21$  in WT vs.  $29.22\mu\text{m}^3 \pm 16.1$  in *Tie2/Lama5<sup>-/-</sup>*) (Fig. 5B), suggesting that endothelial cells are not the cellular source of fractone bulbs. However, *Foxj1/Lama5<sup>-/-</sup>* showed almost complete loss of laminin  $\alpha 5$  staining at fractone bulbs by 1 month of age, and only very few small laminin  $\alpha 5$ + fractones (Fig. 5C, *left panel, arrowheads*). The activation of FoxJ1 promoter starts at P0 and is one of the last maturation steps for ependymal cells, being temporally and spatially heterogeneous. The complete maturation for all ependymal cells do not occur before the third week after birth (Jacquet et al., 2009). Therefore, we investigated whether the few laminin  $\alpha 5$ -containing bulbs seen in Fig. 5C could have been produced before the deletion triggered by the FoxJ1 activation. To answer this, we analyzed the emergence of fractones and the expression of RFP in FoxJ1-RFP reporter mice. We found that in one-week old animals, some regions of the ventricle wall have a large number of RFP+ cells (Fig. 5D, *arrowheads*). We also observed ependymal cells at different stages of late maturation: RFP+ cells with cilia, stained for acetylated tubulin (Fig. 5E, *arrows*), RFP+ cells without cilia (Fig. 5E, *filled arrowheads*) and RFP- cells (Fig. 5E, *hollow arrowheads*) at the ependymal wall that could be ependymal cells in a more immature phenotype. Although the vast majority of fractones were associated with RFP+ cells (Fig. 5E, and *arrows* in F), a few RFP- cells produced early fractones at their apical membrane (Fig. 5F, *arrowheads*), suggesting that while fractones production occurs at the late differentiation program of ependymal cells, there is temporal variation and a few ependymal cells can start producing fractones before FoxJ1 activation. To confirm this possibility, we investigated if laminin  $\alpha 5$  containing bulbs were still present in *Foxj1/Lama5<sup>-/-</sup>* mice at two months of age, revealing no laminin  $\alpha 5$  in fractones and expression only at in endothelial BMs (Fig. 5G, *center*).

Despite the lack of laminin  $\alpha 5$  in *Foxj1/Lama5<sup>-/-</sup>* mice, fractone bulbs were still present as indicated by positive staining for other laminin chains, such as laminin  $\gamma 1$  (Fig 5C) and  $\beta 1$  chains and the other BM components such as collagen type IV and perlecan (not shown). Since laminins are heterotrimers, this finding suggests that other  $\alpha$  chains could be expressed in fractones to

compensate for the lack of laminin  $\alpha 5$ . Screening for the expression of the other laminin  $\alpha$  chains, revealed upregulation of laminin  $\alpha 2$  at fractone bulbs of *Foxj1/Lama5*<sup>-/-</sup> mice, which is almost absent at this site in wild-type animals (Fig 5F).

## ***Foxj1/Lama5*<sup>-/-</sup> mice exhibit increased cell proliferation in the SVZ.**

As laminin  $\alpha 5$  has been shown to maintain embryonic stem cells in a non-differentiated state and to regulate cell proliferation (Domogatskaya et al., 2008; Wegner et al., 2016), we investigated whether the observed changes in laminin isoforms expression in the *Foxj1/Lama5*<sup>-/-</sup> could affect cell proliferation in the SVZ. We compared the number of dividing cells in the SVZ, as assessed by phospho-histone H3 (PH3) staining in whole mounts lateral wall preparations in WT mice and the *Foxj1/Lama5*<sup>-/-</sup> mice, revealing a significant increase in numbers of dividing cells when laminin  $\alpha 5$  was absent from the fractone bulbs (157.5  $\pm$  25.1 vs. 303.8  $\pm$  20.9,  $p=0.0027$ ) (Fig. 6 A, B). However, *Lama4*<sup>-/-</sup>, which have a compensatory upregulation of laminin  $\alpha 5$  in the endothelial BM, and *Tie2/Lama5*<sup>-/-</sup>, which lack this isoform in the endothelial BM, show proliferation levels in the SVZ similar to the wild type (Supp. 3).

## **Discussion**

We show here that a major component of the BM structure that comprises the fractone bulbs at the SVZ is laminin  $\alpha 5$  which is produced by the ependymal cells, and that the laminin isoform content of fractones affects cell division in the SVZ. Deletion of the *Lama5* gene in ependymal cells eliminated laminin  $\alpha 5$  from fractone bulbs, leading to a compensatory expression of laminin  $\alpha 2$  and an associated increase in proliferating cells in the SVZ, as assessed by PH3+ nuclei quantification, suggesting a role for laminins in NSPCs proliferation at this site.

Fractones have been described as structures that emerge from the BMs of blood vessels in the vicinity of the SVZ. Given their expression of laminin  $\alpha 5$ , which is expressed in the CNS mainly by endothelial cells and deposited into the endothelial BM (Sorokin et al., 1997, Sixt et al., 2001), it was logical to postulate endothelial cells as the source of fractones (Shen et al., 2008). However, in addition to endothelium, laminin  $\alpha 5$  is one of the major BM components of epithelial cells (Sorokin et al., 1997a; b) and has been previously described to be expressed by choroid plexus epithelium (Sorokin et al., 1997b). The use of transgenic mice lacking laminin  $\alpha 5$  from endothelial and ependymal cells revealed that the main source of laminin  $\alpha 5$  and presumably also fractones are the ependymal cells lining the ventricle. We show here that fractones are often in the center of pinwheels, formed by adjacent ependymal cells, at the interface between neural stem cells and CSF, and that with age they increase in size and in the number of associations with the GFAP+ neural stem cells.

Our data also showed that changes in laminin isoforms in fractones affect cell proliferation in the SVZ. Loss of laminin  $\alpha 5$  correlated with a broader expression of laminin  $\alpha 2$  in fractones which was associated with increased numbers of proliferating cells in the SVZ. Since laminin  $\alpha 2$  containing BMs also have perlecan as do all BMS, there is no reason to consider that the perlecan content of fractones in *Foxj1/Lama5*<sup>-/-</sup> would be affected. Hence, the capacity to accumulate and present proliferation-inhibiting molecules is probably not impaired and a direct signaling via laminin  $\alpha 5$  is likely to lead an anti-proliferative signal. While the current data does not permit distinction between anti-proliferative effect of laminin  $\alpha 5$  or pro-proliferative effect of laminin  $\alpha 2$ , the former is consistent with data from other tissues suggesting that laminin  $\alpha 5$  is a central factor in other stem cell niches. Stem cell niches in epithelia, bone marrow and the vascular niche in the hippocampus, are all rich in laminin  $\alpha 5$  (Miner et al., 1997; Palmer et al., 2000; Kiel et al., 2005). Laminin  $\alpha 5$  containing isoforms also inhibit differentiation of embryonic stem cells, maintaining them in an anti-proliferative early progenitory state, through integrin signaling (Domogatskaya et al., 2008; Rodin et al., 2010; Hongisto et al., 2012). Consistent with an anti-proliferative effect of laminin  $\alpha 5$  on neural stem cells, integrin  $\alpha 6\beta 1$ , which has a higher affinity for laminin  $\alpha 5$  compared to laminin  $\alpha 2$

containing isoforms (Nishiuchi et al., 2006), and alpha-dystroglycan, are also associated with fractones (Shen et al., 2008; Adorjan and Kalman, 2009) and are downregulated on neural stem cells upon activation (Codega et al., 2014). Delivery of antibodies against this integrin into the CSF leads to a loss of stem cell anchorage and increases proliferation in 50% of the neural stem cells (Shen et al., 2008). However, it was assumed that the endothelial BM was the main source of ligands for the integrin  $\alpha 6 \beta 1$ , even though it was not clear whether stem cell processes directly contact laminin  $\alpha 5$  in the endothelial BM.

As part of the blood-brain barrier, astrocytes ensheath capillaries in the CNS and produce a parenchymal BM rich in laminin  $\alpha 2$ , concealing the endothelial BM from other cells in the brain parenchyma (Hallmann et al., 2005). It is not clear if neural stem cells, due their astrocytic phenotype, contribute to this parenchymal BM in the SVZ. In either scenario, the endothelial BM would not be fully available to integrin binding by neural stem cells. Consistent with this hypothesis, we found that the laminin composition in endothelial BMs does not affect proliferation in the SVZ, suggesting that fractones are the source of laminin  $\alpha 5$  for NSPCs integrin signaling, not blood vessels. In addition, we show here that stem cells can establish far more contacts with fractones than with blood vessels. Hence, most of the exposed ligand for integrin  $\alpha 6 \beta 1$  is the laminin  $\alpha 5$  in fractone bulbs. We therefore propose that the integrin  $\alpha 6 \beta 1$  positive neural stem cells interact with laminin  $\alpha 5$  in the fractones, which maintains neural stem cell character and limits proliferation and differentiation.

We also showed that pinwheels, formed by adjacent ependymal cells, can accommodate fractones at their centers where neural stem cell processes contact the CSF. We presume that these fractones provide an adherence spot for ependymal cell bodies and the apical processes of neural stem cells. In addition, the pinwheel center is a privileged site for tuning stem cell behavior, since the primary cilia at the tip of the apical process works as a signaling hub (Ihrie and Alvarez-Buylla, 2011). Having a BM at this critical site may help to stabilize the apical process in contact with the ventricle, exposing it to growth factors accumulated in fractones and enabling molecules at very low concentrations in the CSF to regulate neurogenesis. This interaction between apical processes and



fractones increases in complexity during aging, as tunneled bulbs fully wrap the apical ending of stem cells. We also observed an increase in size of fractone bulbs with increased age of mice, confirming and extending recent findings which described a reduction in fractone bulb numbers with age (Kerever et al., 2015). The observed correlation between enlarged bulbs and GFAP+ cells clusters, which indicates that GFAP+ cells could participate in the merging of these structures, may result in the reduced fractone number reported by Kerever and co-workers. Taken together with our findings, which suggest an inhibitory effect of laminin  $\alpha 5$  on proliferation, the fusion of fractone bulbs could account for the age-related decline of neurogenesis.

In summary, our work shows that laminin  $\alpha 5$ -containing fractones are a critical element in the SVZ niche, being part of pinwheels and modulating the proliferation of NSPCs. Our data suggest that laminin  $\alpha 5$  in fractones acts as a key stem cell niche factor. Further analyses of *FoxJ1/Lama5*<sup>-/-</sup> mice, investigating the activation states of neural stem cells and changes in NSPC populations will aid in understanding the exact role of laminin  $\alpha 5$  in fractones.

## Acknowledgements

Cells-in-Motion Cluster of Excellence (EXE1003) from the German Research Foundation. Brasiliens-Zentrum of WWU/ DAAD, Conselho Nacional de Desenvolvimento Científico e Tecnológico - Science Without Borders Program (238147/2012-6) for the financial support. Dr. Eva Korpos for discussion, Dr Bhavin Shah for help with whole mounts, Stefan Luetke Enking for technical assistance and Sandra Black Culliton for the art in the last figure. *FoxJ1*<sup>Cre</sup> mice were a generous gift from Dr. Martin Bähler.

## References

Adorjan I, Kalman M. 2009. Distribution of beta-dystroglycan immunopositive globules in the subventricular zone of rat brain. *Glia* 57:657–66.

307 Codega P, Silva-Vargas V, Paul A, Maldonado-Soto ARRR, DeLeo AMMM, Pastrana E, Doetsch F. 2014.  
308 Prospective Identification and Purification of Quiescent Adult Neural Stem Cells from Their In  
309 Vivo Niche. *Neuron* 82:545–559.

310 Colognato H, Yurchenco PD. 2000. Form and function: The laminin family of heterotrimers. *Dev Dyn*  
311 218:213–234.

312 Doetsch F, Caillé I, Lim D a., García-Verdugo JM, Alvarez-Buylla a., Caille I, Lim D a., Garcia-Verdugo  
313 JM, Alvarez-Buylla a. 1999. Subventricular zone astrocytes are neural stem cells in the adult  
314 mammalian brain. *Cell* 97:703–716.

315 Domogatskaya A, Rodin S, Boutaud A, Tryggvason K. 2008. Laminin-511 but not -332, -111, or -411  
316 enables mouse embryonic stem cell self-renewal in vitro. *Stem Cells* 26:2800–9.

317 Douet V, Arikawa-Hirasawa E, Mercier F, Eri A-H, Mercier F, Arikawa-Hirasawa E, Mercier F. 2012.  
318 Fractone-heparan sulfates mediate BMP-7 inhibition of cell proliferation in the adult  
319 subventricular zone. *Neurosci Lett* 528:120125.

320 Durbeek M. 2010. Laminins. *Cell Tissue Res* 339:259–268.

321 Hallmann R, Horn N, Selg M, Wendler O, Pausch F, Sorokin LM. 2005. Expression and function of  
322 laminins in the embryonic and mature vasculature. *Physiol Rev* 85:979–1000.

323 Hongisto H, Vuoristo S, Mikhailova A, Suuronen R, Virtanen I, Otonkoski T, Skottman H. 2012.  
324 Laminin-511 expression is associated with the functionality of feeder cells in human embryonic  
325 stem cell culture. *Stem Cell Res* 8:97–108.

326 Ihrie R a, Alvarez-Buylla A. 2011. Lake-front property: a unique germinal niche by the lateral  
327 ventricles of the adult brain. *Neuron* 70:674–86.

328 Jacquet B V, Salinas-Mondragon R, Liang H, Therit B, Buie JD, Dykstra M, Campbell K, Ostrowski LE,  
329 Brody SL, Ghashghaei HT. 2009. FoxJ1-dependent gene expression is required for differentiation  
330 of radial glia into ependymal cells and a subset of astrocytes in the postnatal brain.

331 Development 136:4021–4031.

332 Kazanis I, Lathia JD, Vadakkan TJ, Raborn E, Wan R, Mughal MR, Eckley DM, Sasaki T, Patton B,  
333 Mattson MP, Hirschi KK, Dickinson ME, French-Constant C. 2010. Quiescence and activation of  
334 stem and precursor cell populations in the subependymal zone of the mammalian brain are  
335 associated with distinct cellular and extracellular matrix signals. J Neurosci 30:9771–81.

336 Kerever A, Mercier F, Nonaka R, Vega S, Oda Y, Zalc B, Okada Y, Hattori N, Yamada Y, Eri A-H, de Vega  
337 S, Oda Y, Zalc B, Okada Y, Hattori N, Yamada Y, Arikawa-Hirasawa E, Vega S, Oda Y, Zalc B,  
338 Okada Y, Hattori N, Yamada Y, Eri A-H, de Vega S, Oda Y, Zalc B, Okada Y, Hattori N, Yamada Y,  
339 Arikawa-Hirasawa E. 2014. Perlecan is required for FGF-2 signaling in the neural stem cell niche.  
340 Stem Cell Res 12:492–505.

341 Kerever A, Yamada T, Suzuki Y, Mercier F, Arikawa-Hirasawa E. 2015. Fractone aging in the  
342 subventricular zone of the lateral ventricle. J Chem Neuroanat 66-67:52–60.

343 Kiel MJ, Yilmaz ÖH, Iwashita T, Yilmaz OH, Terhorst C, Morrison SJ. 2005. SLAM family receptors  
344 distinguish hematopoietic stem and progenitor cells and reveal endothelial niches for stem  
345 cells. Cell 121:1109–1121.

346 Laperle A, Hsiao C, Lampe M, Mortier J, Saha K, Palecek SP, Masters KS. 2015.  $\alpha$ -5 Laminin  
347 Synthesized by Human Pluripotent Stem Cells Promotes Self-Renewal. Stem Cell Reports 5:195–  
348 206.

349 Leonhardt H, Desaga U. 1975. Recent observations on ependyma and subependymal basement  
350 membranes. Acta Neurochir (Wien) 31:153–9.

351 Mercier F, Douet V. 2014. Bone morphogenetic protein-4 inhibits adult neurogenesis and is regulated  
352 by fractone-associated heparan sulfates in the subventricular zone. J Chem Neuroanat 57-  
353 58:54–61.

354 Mercier F, Kitasako JT, Hatton GI. 2002. Anatomy of the brain neurogenic zones revisited: Fractones  
355 and the fibroblast/macrophage network. J Comp Neurol 451:170–88.

356 Mercier F, Kwon YC, Douet V. 2012. Hippocampus/amygdala alterations, loss of heparan sulfates,  
357 fractones and ventricle wall reduction in adult BTBR T+ tf/J mice, animal model for autism.  
358 Neurosci Lett 506:208–13.

359 Mercier F, Schnack J, Saint M, Chaumet G. 2011. Neurogenesis in the Adult Brain I. (Seki T, Sawamoto  
360 K, Parent JM, Alvarez-Buylla A, editors.). Tokyo: Springer Japan.

361 Miner JH, Patton BL, Lentz SI, Gilbert DJ, Snider WD, Jenkins NA, Copeland NG, Sanes JR. 1997. The  
362 laminin  $\alpha$  chains: Expression, developmental transitions, and chromosomal locations of  $\alpha$ 1-5,  
363 identification of heterotrimeric laminins 8- 11, and cloning of a novel  $\alpha$ 3 isoform. J Cell Biol  
364 137:685–701.

365 Mirzadeh Z, Doetsch F, Sawamoto K, Wichterle H, Alvarez-Buylla A. 2010. The subventricular zone en-  
366 face: wholemount staining and ependymal flow. J Vis Exp:1–8.

367 Mirzadeh Z, Merkle FT, Soriano-Navarro M, Garcia-Verdugo JM, Alvarez-Buylla A. 2008. Neural stem  
368 cells confer unique pinwheel architecture to the ventricular surface in neurogenic regions of the  
369 adult brain. Cell Stem Cell 3:265–78.

370 Miyazaki T, Futaki S, Suemori H, Taniguchi Y, Yamada M, Kawasaki M, Hayashi M, Kumagai H,  
371 Nakatsuji N, Sekiguchi K, Kawase E. 2012. Laminin E8 fragments support efficient adhesion and  
372 expansion of dissociated human pluripotent stem cells. Nat Commun 3:1236.

373 Nishiuchi R, Takagi J, Hayashi M, Ido H, Yagi Y, Sanzen N, Tsuji T, Yamada M, Sekiguchi K. 2006.  
374 Ligand-binding specificities of laminin-binding integrins: a comprehensive survey of laminin-  
375 integrin interactions using recombinant  $\alpha$ 3 $\beta$ 1,  $\alpha$ 6 $\beta$ 1,  $\alpha$ 7 $\beta$ 1 and  
376  $\alpha$ 6 $\beta$ 4 integrins. Matrix Biol 25:189–97.

377 Palmer TD, Willhoite AR, Gage FH. 2000. Vascular niche for adult hippocampal neurogenesis. J Comp  
378 Neurol 425:479–494.

379 Rodin S, Domogatskaya A, Ström S, Hansson EM, Chien KR, Inzunza J, Hovatta O, Tryggvason K. 2010.  
380 Long-term self-renewal of human pluripotent stem cells on human recombinant laminin-511.

381 Nat Biotechnol 28:611–615.

382 Schuler F, Sorokin LM. 1995. Expression of laminin isoforms in mouse myogenic cells in vitro and in  
383 vivo. J Cell Sci 108:3795–805.

384 Shen Q, Wang Y, Kokovay E, Lin G, Chuang S-MM, Goderie SK, Roysam B, Temple S. 2008. Adult SVZ  
385 stem cells lie in a vascular niche: a quantitative analysis of niche cell-cell interactions. Cell Stem  
386 Cell 3:289–300.

387 Sixt M, Engelhardt B, Pausch F, Hallmann R, Wendler O, Sorokin LMM. 2001. Endothelial cell laminin  
388 isoforms, laminins 8 and 10, play decisive roles in T cell recruitment across the blood–brain  
389 barrier in experimental autoimmune encephalomyelitis. J Cell Biol 153:933.

390 Smyth N, Vatansever HS, Murray P, Meyer M, Frie C, Paulsson M, Edgar D. 1999. Absence of  
391 Basement Membranes after Targeting the LAMC1 Gene Results in Embryonic Lethality Due to  
392 Failure of Endoderm Differentiation. J Cell Biol 144:151–160.

393 Song J, Lokmic Z, Lämmermann T, Rolf J, Wu C, Zhang X, Hallmann R, Hannocks M-J, Horn N, Ruegg M  
394 a, Sonnenberg A, Georges-Labouesse E, Winkler TH, Kearney JF, Cardell S, Sorokin L. 2013.  
395 Extracellular matrix of secondary lymphoid organs impacts on B-cell fate and survival. Proc Natl  
396 Acad Sci U S A 110:E2915–24.

397 Sorokin L. 1990. Recognition of the laminin E8 cell-binding site by an integrin possessing the alpha 6  
398 subunit is essential for epithelial polarization in developing kidney tubules. J Cell Biol 111:1265–  
399 1273.

400 Sorokin LM, Pausch F, Durbeej M, Ekblom P. 1997a. Differential expression of five laminin alpha (1-5)  
401 chains in developing and adult mouse kidney. Dev Dyn 210:446–62.

402 Sorokin LM, Pausch F, Frieser M, Kröger S, Ohage E, Deutzmann R. 1997b. Developmental regulation  
403 of the laminin alpha5 chain suggests a role in epithelial and endothelial cell maturation. Dev  
404 Biol 189:285–300.

Tavazoie M, Van der Veken L, Silva-vargas V, Louissaint M, Colonna L, Zaidi B, Garcia-Verdugo JM, Doetsch F, Veken L Van Der, Silva-vargas V, Louissaint M, Colonna L, Zaidi B, Doetsch F, Procedures SE, {Van der Veken} L, Garcia-Verdugo JM, Van der Veken L, Silva-vargas V, Louissaint M, Colonna L, Zaidi B, Garcia-Verdugo JM, Doetsch F. 2008. A Specialized Vascular Niche for Adult Neural Stem Cells. *Cell Stem Cell* 3:279–288.

Thyboll J, Kortessmaa J, Cao R, Soininen R, Wang L, Iivanainen A, Sorokin L, Risling M, Cao Y, Tryggvason K. 2002. Deletion of the Laminin 4 Chain Leads to Impaired Microvessel Maturation. *Mol Cell Biol* 22:1194–1202.

Wegner J, Loser K, Apsite G, Nischt R, Eckes B, Krieg T, Werner S, Sorokin L. 2016. Laminin  $\alpha 5$  in the keratinocyte basement membrane is required for epidermal–dermal intercommunication. *Matrix Biol.*

Wu C, Ivars F, Anderson P, Hallmann R, Vestweber D, Nilsson P, Robenek H, Tryggvason K, Song J, Korpos E, Loser K, Beissert S, Georges-Labouesse E, Sorokin LM. 2009. Endothelial basement membrane laminin  $\alpha 5$  selectively inhibits T lymphocyte extravasation into the brain. *Nat Med* 15:519–527.

Zhang Y, Huang G, Shornick LP, Roswit WT, Shipley JM, Brody SL, Holtzman MJ. 2007. A transgenic FOXJ1-Cre system for gene inactivation in ciliated epithelial cells. *Am J Respir Cell Mol Biol* 36:515–9.

## Figure Legends

**Figure 1:** Fractones are a major BM source in the SVZ and appear at the center of pinwheels. **A**, Whole mount of the lateral ventricle wall of an adult mouse immunofluorescently stained for laminin  $\gamma 1$  (green). The frontal view reveals the profuse distribution of fractone bulbs at the neurogenic niche. A higher magnification of the boxed area is depicted in the inset. **B**, Frontal view of the

ependymal cell layer, seen at 1  $\mu$ m depth relative to the ventricular surface, stained for laminin  $\gamma$ 1 (green) to visualize fractones and  $\beta$ -catenin (red) to visualize endymal cell junctions. All fractone bulbs sit at the interface between endymal cells. **C**, Maximum intensity projection of a Z-stack of a whole mount showing a GFAP+ NSC (gray) in contact with one blood vessel (yellow arrow) and more than 10 fractone bulbs (arrowheads) at the same time. **D**, The neural stem cell body also contacts a large bulb located at the center of a pinwheel (arrowhead). **E**, Orthogonal views revealing that the NSC-fractone interaction seen in C-D occurs at the surface of a pinwheel center. **F**, GFAP+ processes contact more bulbs at pinwheel centers (arrowheads) than bulbs at the basolateral surface of endymal cells. Interactions between GFAP+ processes and fractone bulbs were labeled 1-3 and rendered, revealing that GFAP+ processes establish direct and complex contacts with fractones. Scale bars: A: 500  $\mu$ m, inset: 200  $\mu$ m. B-D: 25  $\mu$ m. E: 12  $\mu$ m. F: 25  $\mu$ m.

**Figure 2:** Fractone bulbs are enriched in laminin  $\alpha$ 5. Immunolabeling for laminin  $\alpha$ 2 (red, top), laminin  $\alpha$ 4 (red, middle), laminin  $\alpha$ 5 (red, bottom) and laminin  $\gamma$ 1 (green) showing that fractone bulbs and blood vessels have distinct laminin compositions and that laminin  $\alpha$ 5 is the main  $\alpha$  chain in these structures, followed by a faint presence of laminin  $\alpha$ 2 (arrowheads). Asterisks indicate the ventricular cavity. Scale bars: 100  $\mu$ m

**Figure 3:** Fractones emerge at the apical surface of endymal cells in the first week after birth. **A**, Coronal section of a newborn mouse showing scarce laminin expression (green) at the endymal layer. **B**, *In situ* hybridization of a sagittal section at the same age revealing extensive *Lama5* gene expression (gray in bottom panel, green in right panel) at the endymal layer (arrow) and at the choroid plexus (arrowhead), weeks before protein is detected in blood vessels. **C**, At day 3, laminin  $\alpha$ 5 is expressed in a more punctate pattern in several regions of the endymal surface. **D**, At day 7, early fractone bulbs can be clearly seen in all the ventricular surface. A frontal view of the endymal

layer (**E**) shows fractones at the apical surface of ependymal cells, confirmed by orthogonal sections of a confocal stack (**F**). **G**, At the same time, laminin  $\gamma 1$  can be seen both as a punctate pattern at the apical cell surface and a diffuse intracellular stain inside RFP+ ependymal cells in FoxJ1-RFP mice. Asterisks indicate the ventricular cavity. Scale bars: A: 50  $\mu\text{m}$ , B: 200  $\mu\text{m}$ , higher magnification: 130  $\mu\text{m}$ , C: 50  $\mu\text{m}$ , D: 50  $\mu\text{m}$ , E: 25  $\mu\text{m}$ , F: 5  $\mu\text{m}$ , G: 10  $\mu\text{m}$ .

**Figure 4:** Fractones undergo major transformations with aging. **A**, Fractones bulbs, identified by immunofluorescent staining using a pan-laminin antibody (panLM) (top panel), at three different ages. The volume of each individual bulb is color-coded, showing that these structures increase in size with age. **B**, The mean volumes of fractones correlate with age ( $R^2 = 0.91$ , left panel). An analysis of frequency showing that the median value for the volume of fractones also increases with age. **C**, A pinwheel in a whole mount of an 8 months old mouse showing a tunneled fractone bulb at its center. Orthogonal views show a GFAP+ process (gray) sheathed by the fractone BM (green). **D**, Unusually large fractones (green, arrowheads) are associated with clusters of GFAP+ cells (gray, arrows). **E**, A detailed view of a cell cluster shows strong expression of  $\beta$ -catenin (red) in its margins and fractones fragments (arrowheads) in its interior. **F**, A tridimensional reconstruction of a giant fractone associated with a cell cluster showing how GFAP+ processes transverse these structures. Scale bars: A: 30  $\mu\text{m}$ , C: 5  $\mu\text{m}$ , D: 50  $\mu\text{m}$ , E: 10  $\mu\text{m}$ , F: 5  $\mu\text{m}$

**Figure 5:** Deletion of the *Lama5* gene in ependymal cells eliminates laminin  $\alpha 5$  in fractones bulbs. **A**, Expression of laminin  $\alpha 5$  (green) is not altered in mice lacking the *Lama5* gene in endothelial cells (Tie2/*Lama5*<sup>-/-</sup>), showing that these cells are not the source of the laminin  $\alpha 5$  found in fractones. **B**, Analysis of the volume of fractones showing no difference in bulb size among these genotypes (data are mean  $\pm$  SEM, t-test n=3) **C**, The vast majority of fractones in one month old FoxJ1/*Lama5*<sup>-/-</sup> lack laminin  $\alpha 5$ , the main  $\alpha$  chain in wild type animals. **D**, One week old FoxJ1-RFP report mice, expressing



RFP upon FoxJ1 promoter activation, show that in some ependymal cells the FoxJ1 promoter is not active at one week after birth (arrowheads). **E**, Lateral ventricle of a FoxJ1-RFP mouse showing the emergence of fractones at the apical surface of ependymal cells. At P7, the ventricle wall is lined by ependymal cells in different stages of maturation: ciliated RFP+ ependymal cells (*arrows*), non-ciliated RFP+ ependymal cells (*arrowheads*) and RFP- cells (*hollow arrowheads*) are present. **F**, While most of the fractones are at the surface of RFP+ cells, some RFP- cells have fractones (arrowheads). Thin optical sections (0.3  $\mu$ m) of RFP+ ependymal cells producing fractones at their apical membrane. **G**, Two month old FoxJ1/*Lama5*<sup>-/-</sup> mice have no laminin  $\alpha$ 5 in fractone bulbs, instead, there is a compensatory upregulation of laminin  $\alpha$ 2 in these structures, (**H**) with a immunoreactivity similar to the blood capillaries in the vicinity (arrowheads). Scale bars: A: 25  $\mu$ m, C: 25  $\mu$ m, D: 100  $\mu$ m, E: 25  $\mu$ m, F: 10  $\mu$ m, G: 20  $\mu$ m, H: 20 $\mu$ m.

**Figure 6** Laminin content of fractone bulbs affect cell proliferation in the SVZ. **A**, Whole mounts of the lateral wall of the lateral ventricle of WT, FoxJ1/*Lama5*<sup>-/-</sup>, Tie2/*Lama5*<sup>-/-</sup> and *Lama4*<sup>-/-</sup> mice were immunofluorescently stained for PH3, a mitosis marker. FoxJ1/*Lama5*<sup>-/-</sup> animals have a significant increase in the number of dividing cells comparing to wild type animals, quantified in **B**. Dots represent individual wholemounts. Scale bars: A: 500  $\mu$ m, high magnification: 50  $\mu$ m.

**Figure 7** Laminin in fractone bulbs affects proliferation in the SVZ. Neural stem cells (B cells, in blue) contact BMs from blood vessels (BV) and from fractones bulbs, which are produced by ependymal cells (E cells, in yellow). Fractone bulbs likely help the anchorage of NSC processes in the ependymal layer, including in the center of pinwheels. They are enriched in laminin  $\alpha$ 5 and changes in the laminin composition affect proliferation in the SVZ, most likely due changes in cell adhesion leading to activation of NSCs and generation of intermediary progenitors (C cells, in green) and neuroblasts

(A cells, in red). Laminin  $\alpha 5$  is also found in the endothelial BM of blood vessels, but they are not accessible to neighboring cells since they are enclosed by the parenchymal BM.

**Supplementary Figure 1** Interactions of GFAP+ processes with fractone bulbs at pinwheel centers. **A**, Tridimensional reconstruction of the pinwheel seen in Fig.1C-E, showing the interactions of a NSC body with a bulb at the pinwheel center and its processes reaching several other fractones. **B**, Orthogonal views of the image seen in Fig. 1F, confirming that fractone bulbs sit between ependymal cells at pinwheel centers and GFAP+ processes directly contact them. Scale bars: A: 50  $\mu$ m, B: 12  $\mu$ m.

**Supplementary Figure 2** The emergence of fractones bulbs is spatially heterogeneous. At P3, the first fractones appear at the ventricle wall (*arrow*), seen as a punctate expression of laminin  $\gamma 1$ , while most of the walls are devoid of laminins (*arrowhead*). Boxes are higher magnifications of the indicated areas. Scale bar: 50  $\mu$ m, higher magnification: 20  $\mu$ m

**Supplementary Figure 3** Laminin content of endothelial BM do not affect cell proliferation in the SVZ. Whole mounts of the lateral wall of Tie2Cre/*Lama5*<sup>-/-</sup>, a lineage that does not express laminin  $\alpha 5$  in endothelial cells and *Lama4*<sup>-/-</sup>, a lineage with a compensatory overexpression of laminin  $\alpha 5$  in the endothelium, were prepared and immunofluorescently labeled for PH3. These lineages showed a proliferative pattern at the SVZ similar to wild type animals. Scale bars: A: 500  $\mu$ m, high magnification: 50  $\mu$ m.

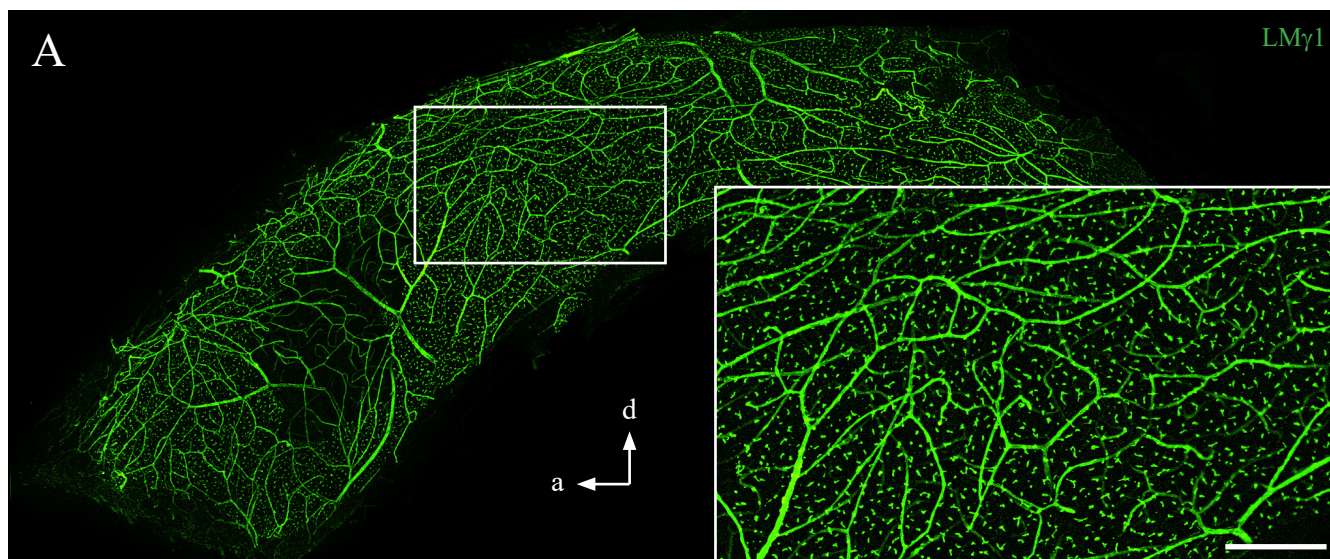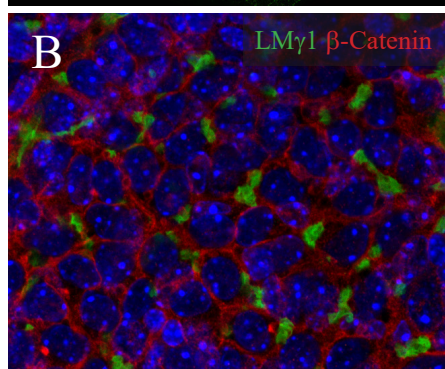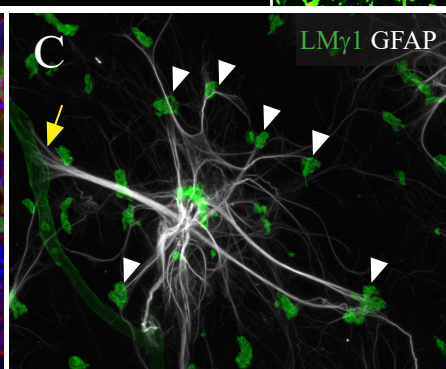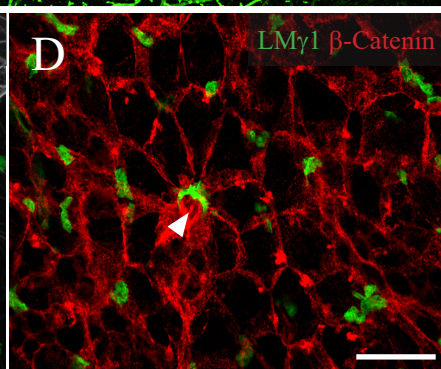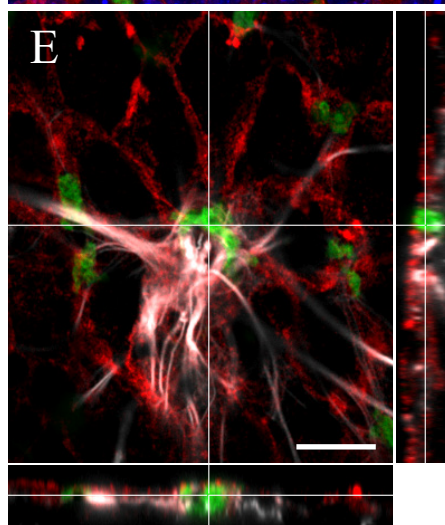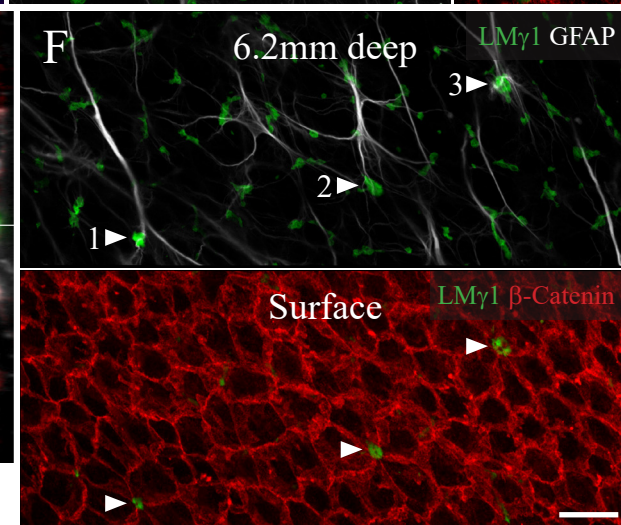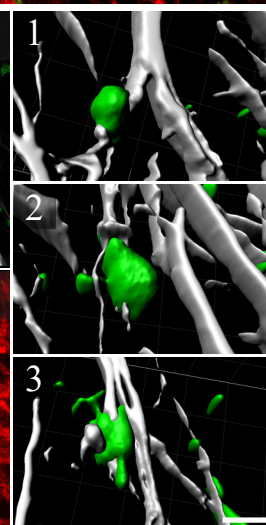



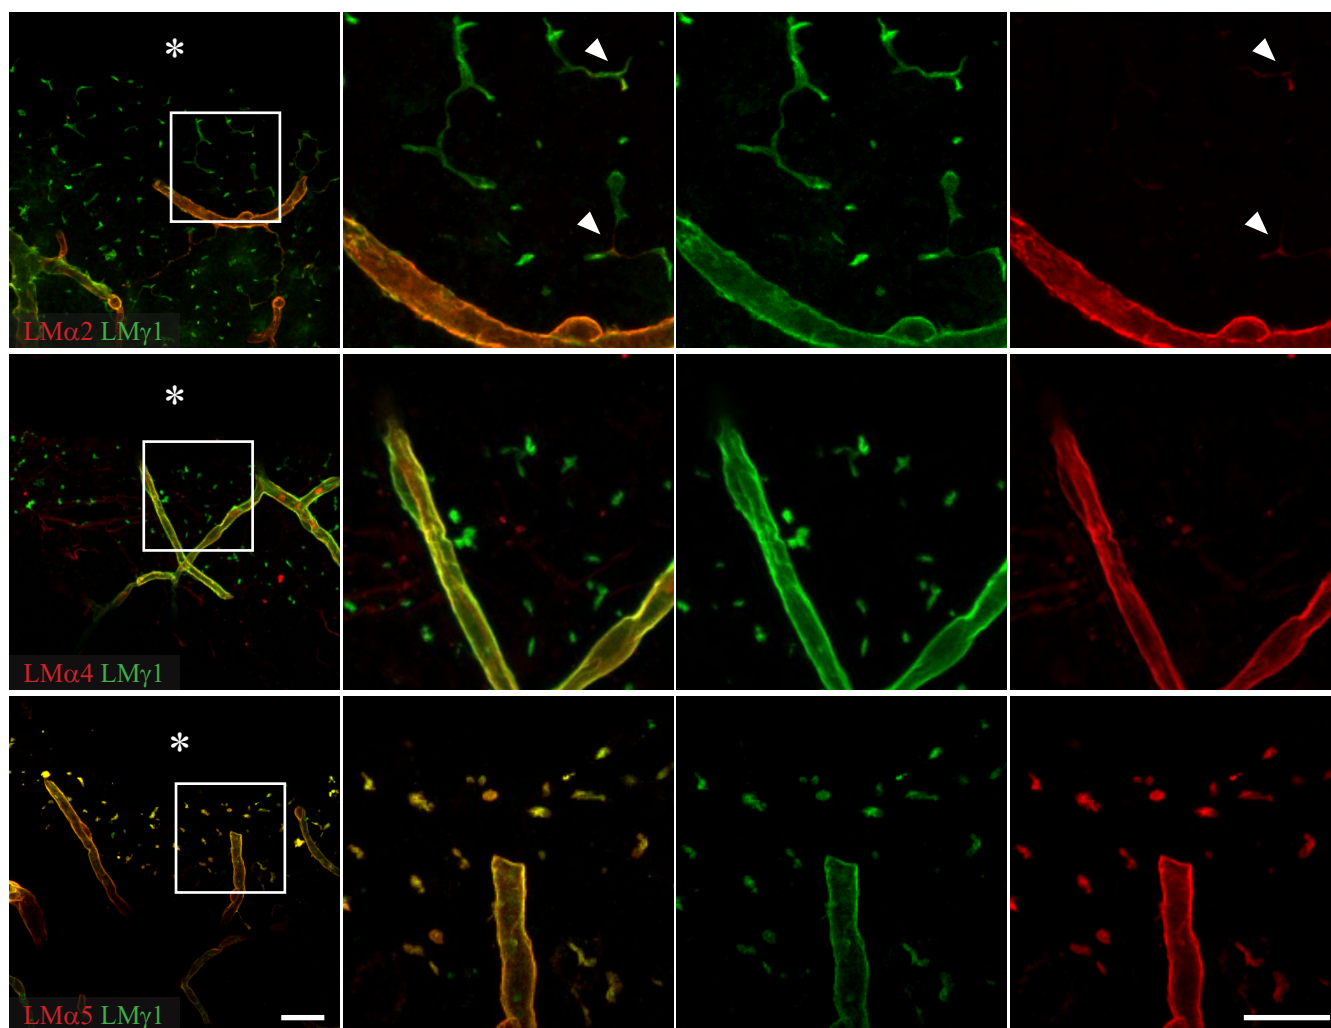

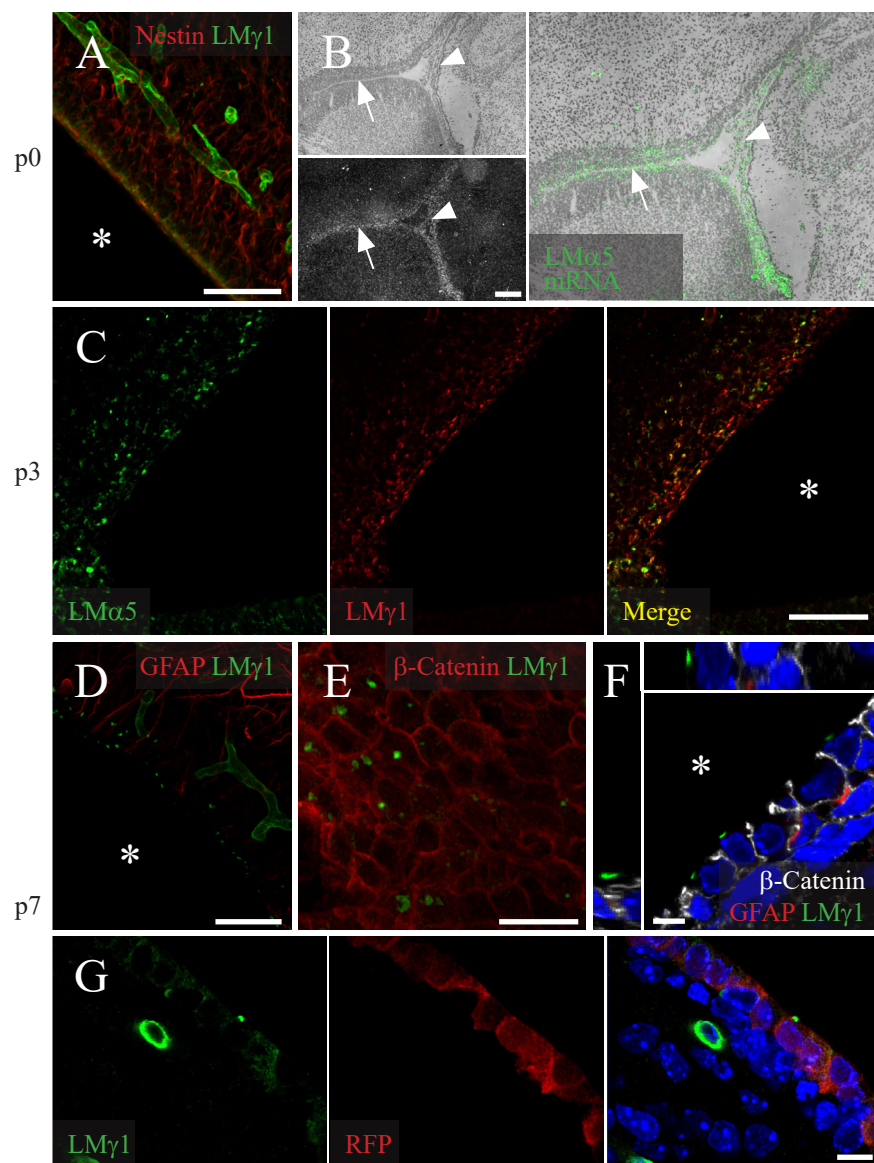

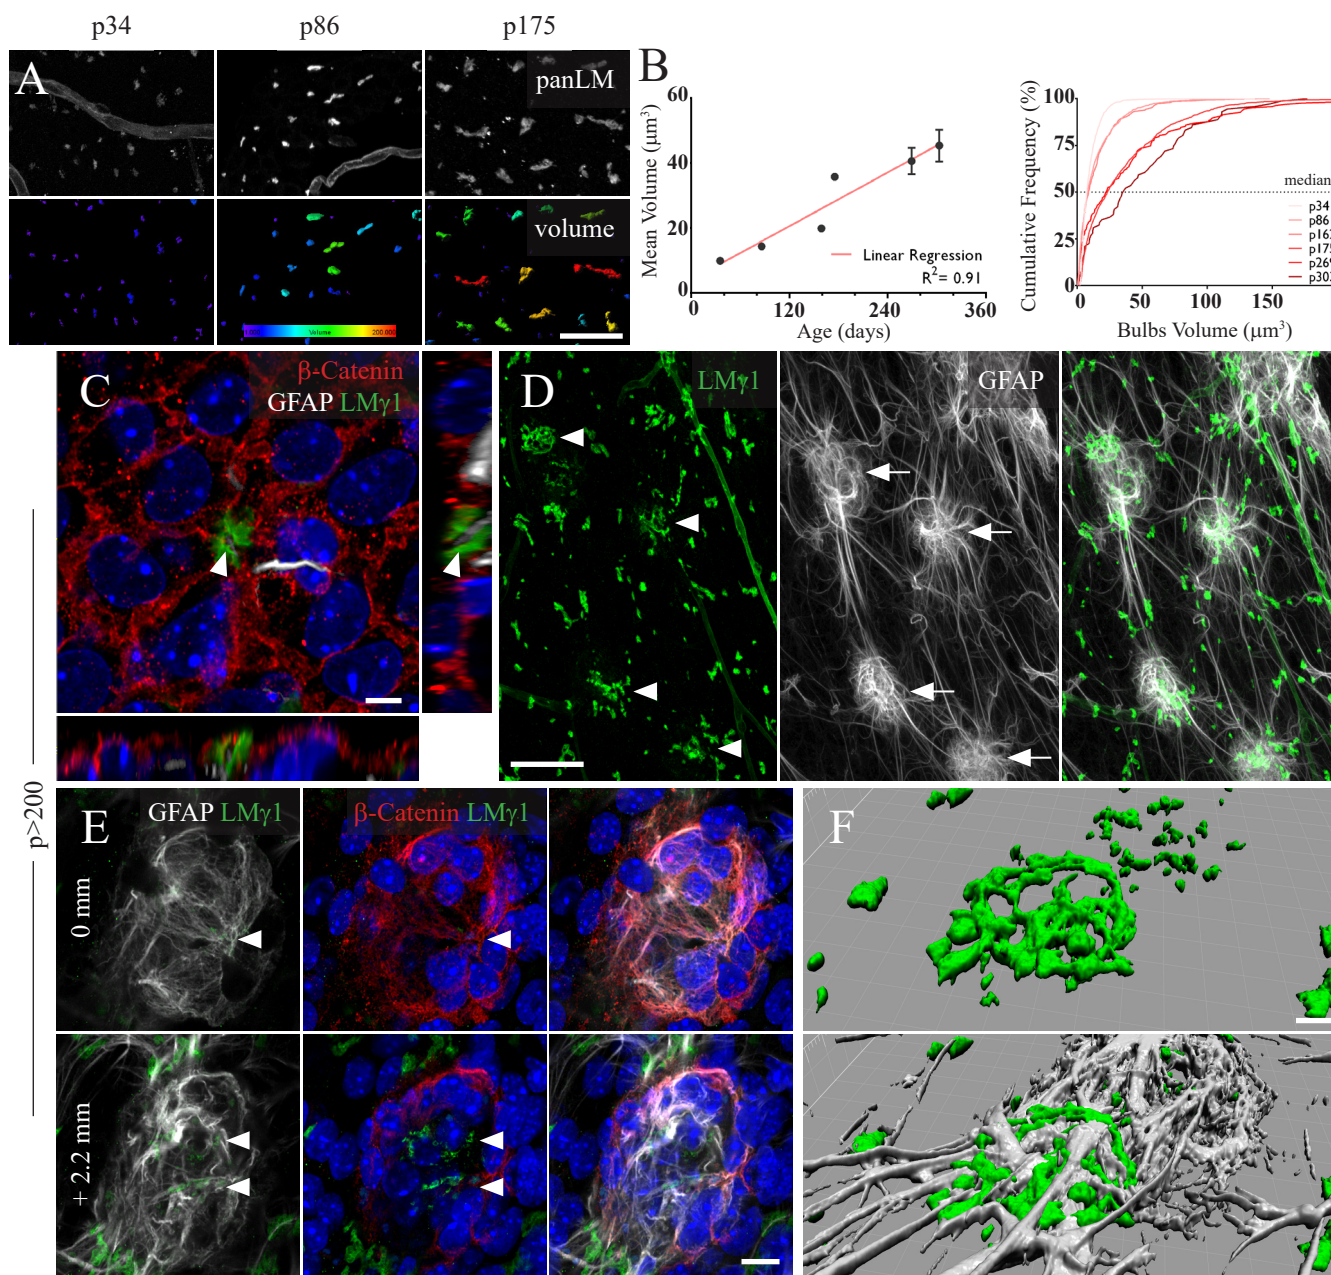



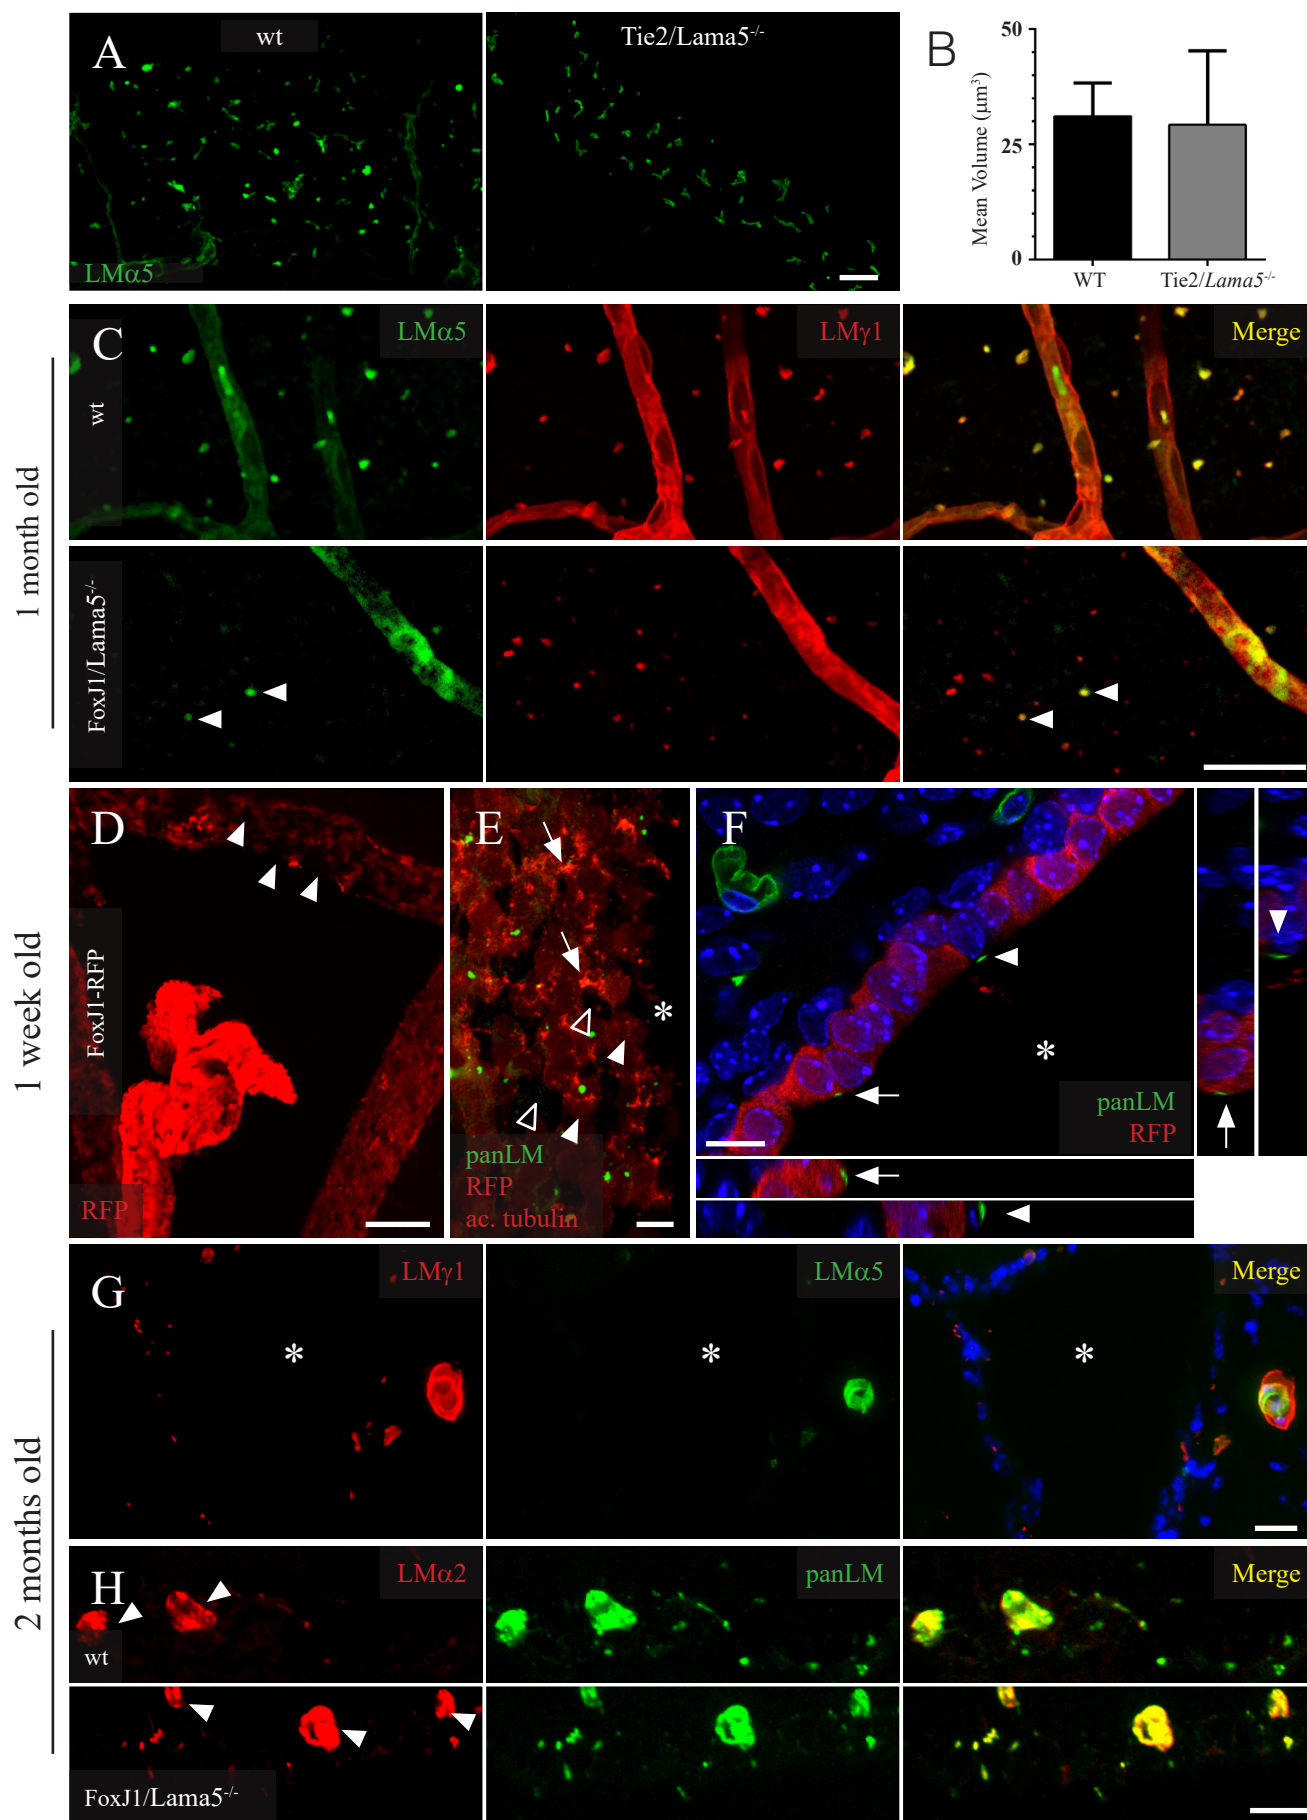

**A**

WT

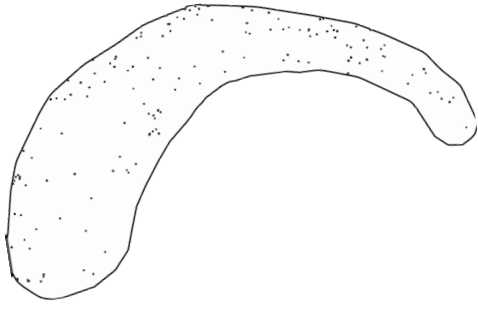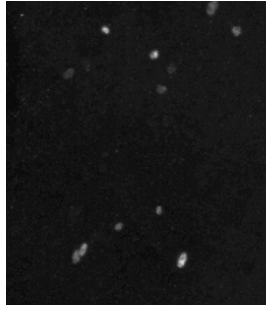

FoxJ1/Lama5<sup>-/-</sup>

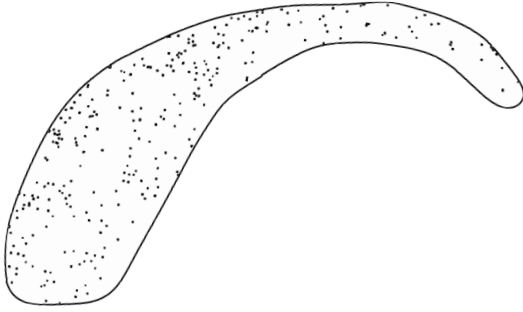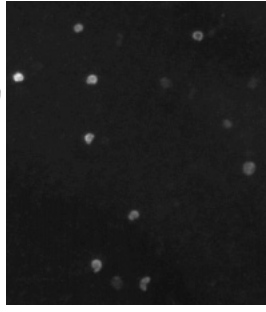

**B**

PH3+ nuclei/wholemount

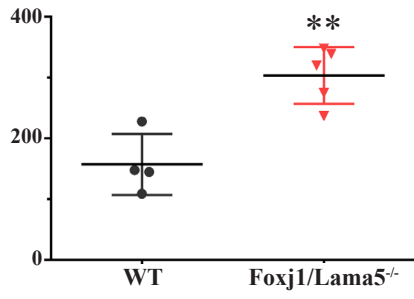



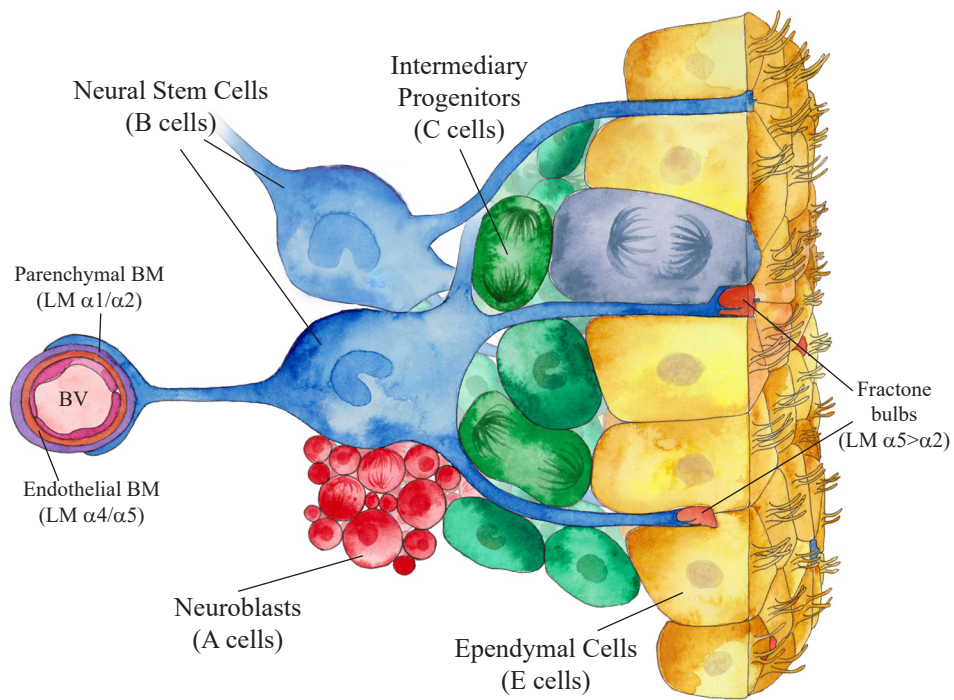

Source: http://biorxiv.org/content/10.1101/093351v1.full.pdf
